# Supplementary material for: Mechanical activation of a dithioester derivative-based retro RAFT-HDA reaction
Source: Royal Society of Chemistry journal article supplement (doi:10.1039/c4py00964a), 2014-09-05
Supplement: c4py00964a1.pdf [file c4py00964a1.pdf]

## **SUPPORTING INFORMATION**

*For*

### **Mechanical Activation of a Dithioester Derivative-based Retro RAFT-HDA Reaction**

*Zhijian Wang, Zhiyong Ma, Zhenyu Zhang, Feng Wu, Hong Jiang and Xinru Jia\**

## Supporting Information

### 1. Materials and Characterizations:

Picolylchloride hydrochloride (97 %, J&K Chemicals), benzenesulfonic acid salt (97 %, J&K Chemicals), tetrapropylammonium bromide (98 %, J&K Chemicals), 1,8-diazabicyclo[5.4.0]undec-7-ene (DBU) (98 %, J&K Chemicals), elemental sulfur (powder, Sinopharm Chemical Reagent Co. Ltd.), potassium *tert*-butanolate (97 %, TCI chemicals), *p*-xylylene bromide (97 %, Adamas), *trans,trans*-2,4-hexadien-1-ol (98 %, stab. with 0.1%  $\alpha$ -tocopherol, Alfa Aesar), 2-bromo-2-methylpropionyl bromide (98 %, J&K Chemicals), hydroquinone (99 %, Xilong Huagong), triethylamine (99.5 %, Sigma-Aldrich), 1-(hydroxymethyl) pyrene (98 %, Adamas) nickelocene (98 %, TCI chemicals), triphenylphosphine (99 %, J&K Chemicals), sodium iodide (99 %, Tianjin Jinke) and trifluoroacetic acid (TFA) (99 %, Sigma-Aldrich) were used as received. Azodiisobutyronitrile (AIBN) was recrystallized from methanol. Tetrahydrofuran (THF), methyl acrylate (MA), styrene (St) and chloroform was distilled following the standard procedures. Other solvents and reagents, unless stated specifically, were purchased from Beijing Chemical Reagent Co. and used as received.

$^1\text{H}$  and  $^{13}\text{C}$  NMR data were collected on Bruker 400 MHz spectrometers operated at room temperature with  $\text{CDCl}_3$  as the solvent. Chemical shifts ( $\delta$ ) are reported in ppm with  $(\text{CH}_3)_4\text{Si}$  and the residual solvent peak as the reference, respectively. UV-Vis spectra were recorded on the Perkin-Elmer Instruments Lambda spectrometer. High resolution mass spectra (HRMS) were measured by Bruker APEX IV Fourier Transform Ion Cyclotron Resonance Mass Spectrometer. Molecular weight and PDI were measured by a gel permeation chromatograph (GPC) equipped with a Waters 410 refractive-index detector, a Waters 515 HPLC pump, and HT1, 2, 4 columns with THF as an eluent at a flow rate of 1.0 mL/min at 35°C. Monodispersity polystyrene standards were used for calibration.

### General Sonication Conditions:

The sonication experiments were performed using a JY96-II Ultrasonic Cell Crusher Instrument (Ningbo Scientz Biotechnology Co. LTD) operating at 20 kHz equipped with 6 mm tip titanium probe. The whole system was immersed in an ice-salt bath and pulsed ultrasound was applied (1.0 s on and 1.0 s off) at 300 W for 3 h for each experiment.

## 2. Synthesis:

### Synthesis of 2-picoly phenyl sulfone

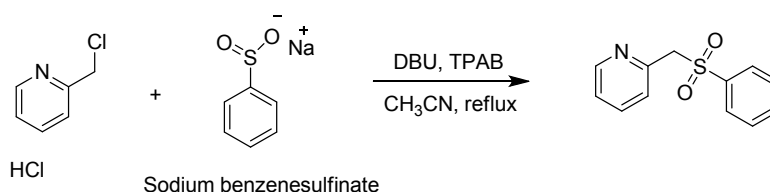

The synthetic procedures were same as the description in the literature.<sup>[S1]</sup> Picolychloride (2.81 g, 17.1 mmol), sodium benzenesulfinate (4.20 g, 25.6 mmol) and tetrapropylammonium bromide (0.94 g, 3.53 mmol) were dissolved in 40 mL acetonitrile. A solution of DBU (2.60 g, 17.1 mmol) in 10 mL acetonitrile was added into the mixture dropwise. The mixture was refluxed overnight. After that, the solvent was evaporated under vacuum, and the crude product was dissolved in dichloromethane (50 mL) and washed with water (100 mL). The organic phase was dried over anhydrous Na<sub>2</sub>SO<sub>4</sub> and collected under vacuum. The targeted compound was obtained as a brown solid. Yield: 86 %.

<sup>1</sup>H NMR (400 MHz, CDCl<sub>3</sub>) δ 8.43 (dd, *J* = 4.9, 0.8 Hz, 1H), 7.74 (td, *J* = 7.7, 1.8 Hz, 1H), 7.70 (dd, *J* = 8.3, 1.1 Hz, 2H), 7.65 – 7.57 (m, 1H), 7.53 – 7.43 (m, 3H), 7.32 – 7.24 (m, 2H), 4.61 (s, 2H).

<sup>13</sup>C NMR (101 MHz, CDCl<sub>3</sub>) δ 148.94, 148.53, 138.22, 137.43, 133.86, 129.03, 128.43, 126.04, 123.59, 64.04.

HR-ESI-MS: C<sub>12</sub>H<sub>12</sub>NO<sub>2</sub>S, Mass Calculated: 234.05833, Mass Measured: 234.05811

### Synthesis of dithioester **1**

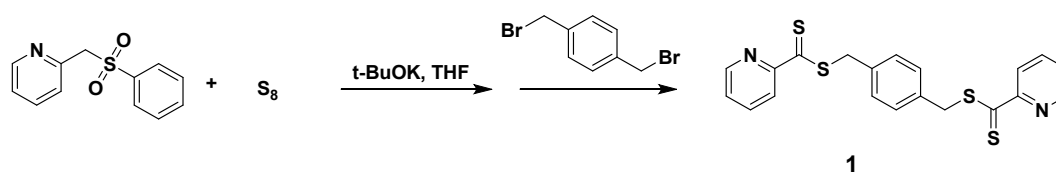

A mixture of 2-picoyl phenyl sulfone (1.60 g, 6.87 mmol) and elemental sulfur (S<sub>8</sub>, 0.69 g, 21.6 mmol) in THF (20 mL) was cooled in an ice-salt bath. Then, potassium *tert*-butanolate (2.32 g, 20.7 mmol) was added. The mixture turned red and was stirred overnight. A solution of *p*-xylylene bromide (0.79 g, 3.0 mmol) in 10 mL THF was added and the mixture was stirred for another 8 h. The solution was dried and dissolved in 100 mL dichloromethane. The organic phase was washed with water (30 mL) until the aqueous phase was slightly yellowish. The organic phase was dried over anhydrous Na<sub>2</sub>SO<sub>4</sub> and evaporated under vacuum. The crude product was purified through a silica column with dichloromethane as the eluent. The product was given as a red solid. Yield: 23 %.

<sup>1</sup>H NMR (400 MHz, CDCl<sub>3</sub>) δ 8.61 (d, *J* = 4.0 Hz, 1H), 8.32 (d, *J* = 8.0 Hz, 1H), 7.80 (td, *J* = 7.8, 1.7 Hz, 1H), 7.52 – 7.44 (m, 1H), 7.35 (s, 2H), 4.52 (s, 2H).

<sup>13</sup>C NMR (101 MHz, CDCl<sub>3</sub>) δ 156.29, 147.89, 136.96, 134.50, 129.66, 126.77, 122.22, 41.11.

HR-ESI-MS: C<sub>20</sub>H<sub>17</sub>N<sub>2</sub>S<sub>4</sub>, Mass Calculated: 413.02691, Mass Measured: 413.02641

### Synthesis of the open-chain diene **2**

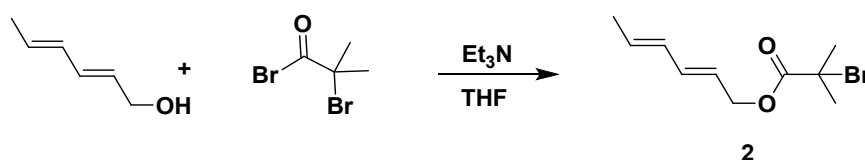

The *trans, trans*-hexadien-1-ol (1.00 g, 10.2 mmol) was dissolved in 20 mL anhydrous THF, and triethylamine (TEA) (1.52 g, 15.0 mmol) was added dropwise. The mixture was cooled in an ice salt bath for 20 min. Then  $\alpha$ -bromoisobutyryl bromide (2.87 g, 12.5 mmol) was added dropwise. After the solution was stirred at

room temperature for 12 h, the resulting salt TEA·HBr was filtrated. The filtrate was collected and evaporated in vacuo. The crude product was purified through a silica column with ethyl acetate/petroleum ether (1/20) as the eluent. The product was given as pale yellow oil. Yield: 90 %.

$^1\text{H}$  NMR (400 MHz,  $\text{CDCl}_3$ )  $\delta$  6.30 (dd,  $J = 15.2, 10.5$  Hz, 1H), 6.07 (ddd,  $J = 14.7, 10.5, 1.2$  Hz, 1H), 5.78 (dd,  $J = 15.0, 6.8$  Hz, 1H), 5.70 – 5.59 (m, 1H), 4.67 (d,  $J = 6.6$  Hz, 2H), 1.93 (s, 6H), 1.77 (d,  $J = 6.7$  Hz, 3H).

$^{13}\text{C}$  NMR (101 MHz,  $\text{CDCl}_3$ )  $\delta$  171.31, 135.23, 131.50, 130.30, 122.77, 66.32, 55.76, 30.71, 18.06.

HR-ESI-MS:  $\text{C}_{10}\text{H}_{15}\text{BrNaO}_2$ , Mass Calculated: 269.01476, Mass Measured: 269.01448

#### Synthesis of **DAPy-2Br**

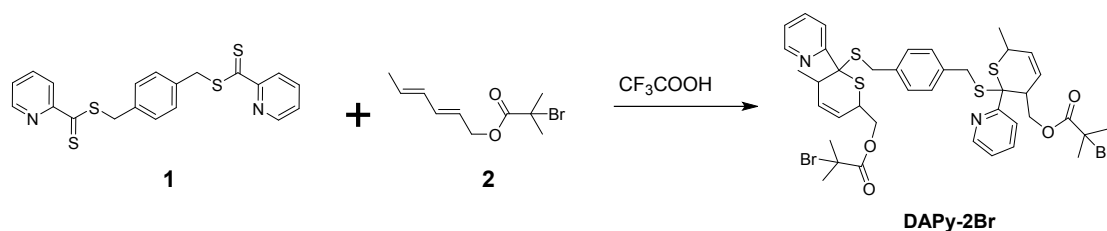

A mixture of compound **2** (0.32 g, 1.3 mmol) and compound **1** (0.08 g, 0.2 mmol) in 5 mL  $\text{CHCl}_3$  was stirred in room temperature for 2 d. Then the solution was evaporated under vacuum and the crude product was purified through a silica column with  $\text{CHCl}_3$  as the eluent. The product was obtained as a colorless solid. Yield: 35 %.

$^1\text{H}$  NMR (400 MHz,  $\text{CDCl}_3$ )  $\delta$  8.54 (d,  $J = 4.5$  Hz, 1H), 7.78 (d,  $J = 8.0$  Hz, 1H), 7.67 (t,  $J = 7.2$  Hz, 1H), 7.18 (dd,  $J = 7.4, 4.0$  Hz, 1H), 6.85 (s, 2H), 5.86 (dt,  $J = 19.5, 6.5$  Hz, 2H), 4.10 (dd,  $J = 10.8, 7.4$  Hz, 1H), 3.91 (dd,  $J = 10.9, 5.1$  Hz, 1H), 3.75 – 3.67 (m, 1H), 3.64 (d,  $J = 12.3$  Hz, 1H), 3.19 (d,  $J = 12.2$  Hz, 2H), 1.78 (d,  $J = 21.7$  Hz, 5H), 1.45 (d,  $J = 7.3$  Hz, 3H).

$^{13}\text{C}$  NMR (101 MHz,  $\text{CDCl}_3$ )  $\delta$  171.23, 147.82, 136.81, 132.21, 129.27, 129.18, 128.91, 125.95, 122.69, 68.15, 55.60, 44.25, 34.61, 34.53, 30.77, 30.61, 30.54, 18.80, 18.25.

HR-ESI-MS:  $\text{C}_{40}\text{H}_{47}\text{Br}_2\text{N}_2\text{O}_4\text{S}_4$ , Mass Calculated: 905.07799 Mass Measured:

905.07999

### Synthesis of compound **S1**

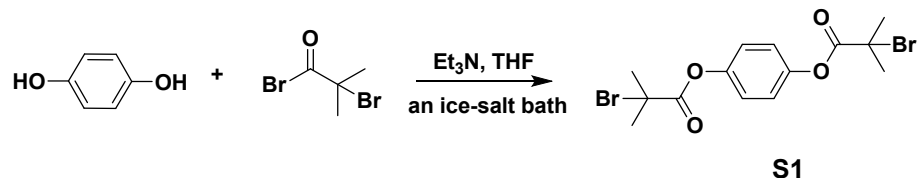

The compound **S1** was used as a model initiator to obtain the poly(methyl acrylate)s without mechanophore embedded in the polymer chain.

Hydroquinone (2.00 g, 18.2 mmol) was dissolved in THF (50 mL) and triethyl amine (5.20 g, 54.5 mmol) was added. The mixture was put in an ice-salt bath for 20 min. After that, 2-bromo-2-methylpropionyl bromide (10.02 g, 43.6 mmol) was added into the mixture dropwise. The mixture was stirred at ambient temperature overnight and filtrated. The filtrate was concentrated under vacuo. The crude product was purified through a silica column with ethyl acetate/petroleum ether (1/40) as the eluent. Yield: 91 %.

$^1\text{H NMR}$  (400 MHz,  $\text{CDCl}_3$ )  $\delta$  7.18 (s, 4H), 2.06 (s, 12H).

$^{13}\text{C NMR}$  (101 MHz,  $\text{CDCl}_3$ )  $\delta$  170.02, 148.36, 122.03, 55.17, 30.56.

HR-ESI-MS:  $\text{C}_{14}\text{H}_{17}\text{Br}_2\text{O}_4$ , Mass Calculated: 406.94881 Mass Measured: 406.94908

### Synthesis of the labeled molecule **S3**

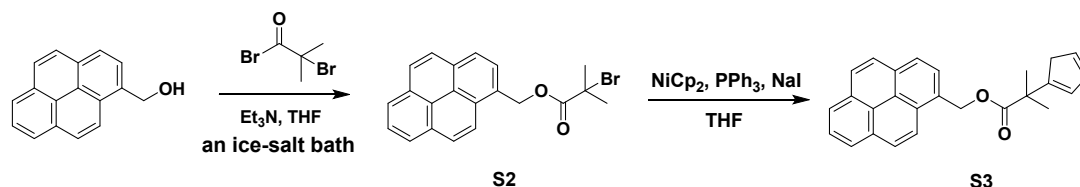

1-pyrenemethanol (1.00 g, 4.27 mmol) was dissolved in 20 mL THF, followed by adding triethyl amine (0.66 g, 6.41 mmol) dropwise. The solution was cooled in an ice-salt bath for 20 min. Then the solution of 2-bromo-2-methylpropionyl bromide (1.21 g, 5.26 mmol) in 10 mL THF was added into the mixture dropwise. The mixture was stirred for another 24 h. After that, the mixture was filtrated and the filtrate was

concentrated under vacuo. The crude product of **S2** was purified through a silica column with dichloromethane as the eluent. Yield: 84 %.

$^1\text{H}$  NMR (400 MHz,  $\text{CDCl}_3$ )  $\delta$  8.25 (d,  $J = 9.2$  Hz, 1H), 8.18 (dd,  $J = 7.4, 4.6$  Hz, 2H), 8.13 (dd,  $J = 8.5, 5.0$  Hz, 2H), 8.02 (dt,  $J = 18.7, 7.6$  Hz, 4H), 5.88 (s, 2H), 1.92 (s, 6H).

$^{13}\text{C}$  NMR (101 MHz,  $\text{CDCl}_3$ )  $\delta = 171.50, 131.63, 131.01, 130.50, 129.32, 128.04, 127.97, 127.70, 127.39, 127.16, 125.93, 125.39, 125.34, 124.65, 124.40, 122.67, 66.28, 55.83, 30.71$ .

HR-ESI-MS:  $\text{C}_{21}\text{H}_{17}\text{BrNaO}_2$ , Mass Calculated: 403.03041 Mass Measured: 403.03157

Compound **S2** (0.66 g, 1.75 mmol) and triphenylphosphine (0.47 g, 1.75 mmol) were dissolved in 15 mL THF in a Schlenk tube. Sodium iodide (0.79 g, 5.26 mmol) was added into the solution. The tube was sealed and three freeze-pump-thaw cycles were conducted to remove the oxygen. Then, nickelocene (0.20 g, 1.05 mmol) was added into the mixture and another three freeze-pump-thaw cycles were conducted. After being stirred under nitrogen at room temperature for 24 h, the mixture was poured into n-hexane and filtrated. The filtrate was concentrated under vacuo. The crude product was purified through a silica column with ethyl acetate/petroleum ether (1/8) as the eluent. Yield: 77 %.

$^1\text{H}$  NMR (400 MHz,  $\text{CDCl}_3$ )  $\delta$  8.10 (m, 9H), 6.58 – 6.29 (m, 2H), 6.28 – 6.07 (m, 1H), 5.80 (d,  $J = 6.1$  Hz, 2H), 2.91 (d,  $J = 4.5$  Hz, 2H), 1.47 (s, 6H).

$^{13}\text{C}$  NMR (101 MHz,  $\text{CDCl}_3$ )  $\delta$  176.23, 151.58, 150.13, 133.80, 132.64, 132.14, 131.79, 131.60, 131.57, 131.22, 130.72, 129.41, 129.17, 129.11, 128.01, 127.85, 127.72, 127.69, 127.42, 127.38, 127.35, 126.05, 125.96, 125.45, 125.41, 125.36, 124.84, 124.64, 124.56, 124.53, 123.10, 122.96, 65.23, 44.60, 43.86, 41.16, 41.12, 26.01, 25.23.

HR-ESI-MS:  $\text{C}_{26}\text{H}_{23}\text{O}_2$ , Mass Calculated: 367.16926, Mass Measured: 367.16996

#### *Representative Procedures for the synthesis of DAPyPn*

The polymerization was conducted using a classical SET-LRP method. A 25 mL

Schlenk flask was charged with 2 mL MA (2.0 mL, 22.1 mmol), 18.23 mg (0.02 mmol) difunctional initiator **DAPy-2Br** and 1 mL DMSO. The solution was stirred for several minutes to ensure the homogeneity. Then two pieces of Cu sheet were cut into small pieces and added into the flask. The flask was sealed and three freeze-pump-thaw cycles were conducted to remove the oxygen. After that, 10  $\mu$ L Me<sub>6</sub>(TREN) was added into the mixture, and the flask was immediately sealed and degassed by another three freeze-pump-thaw cycles. After being stirred in an oil bath for 24 h at 25°C, the flask was opened and 5 mL CHCl<sub>3</sub> was added. The solution was filtered through a short column of basic alumina. After the solvent was evaporated in vacuo, the product was precipitated in methanol. The resulting polymer was collected and dried under vacuum at room temperature.

*Representative Procedures for the synthesis of HQPn*

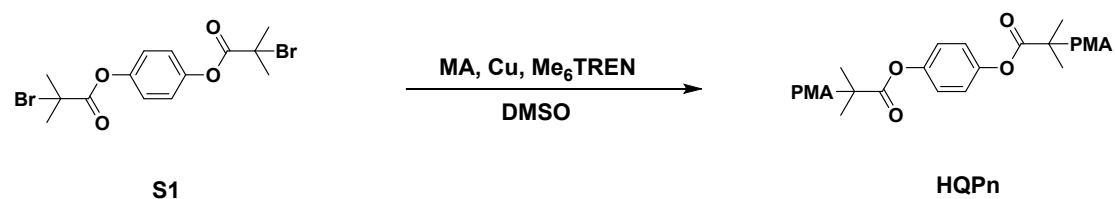

The polymerization of **HQPn** is similar to the procedures of **DAPyPn**. A 25 mL Schlenk flask was charged with 2 mL MA (2.0 mL, 22.1 mmol), 8.14 mg difunctional initiator **S1** and 1 mL DMSO. The solution was stirred for several minutes to ensure the homogeneity. Then two pieces of Cu sheet were cut into small pieces and added into the flask. The flask was sealed and three freeze-pump-thaw cycles were conducted to remove the oxygen. After that, 20  $\mu$ L Me<sub>6</sub>(TREN) was added into the mixture and the flask was immediately sealed and degassed by another three freeze-pump-thaw cycles. After being stirred in an oil bath for 24 h at 25°C, the flask was opened and 5 mL CHCl<sub>3</sub> was added. The solution was filtered through a short column of basic alumina. After the solvent was evaporated in vacuo, the polymer was precipitated in methanol. The resulting polymer was collected and dried under vacuum at room temperature.



*Representative Procedures for labelling of DAPyP6-3h by compound S3*

**DAPyP6** (120.78 mg) was dissolved in 6 mL CHCl<sub>3</sub> (20 mg/mL) and the solution was subjected to the pulsed ultrasound in an ice-bath for 3 h. The colorless solution turned into yellow. Then compound **S3** (5.26 mg) was added into the solution. 2 μL CF<sub>3</sub>COOH was added into the mixture. After being stirred at room temperature for 2 d, the solution was evaporated under vacuo, and the crude product was precipitated in petroleum ether. The precipitate was collected and characterized by <sup>1</sup>H NMR and GPC.

*Representative Procedure for the RAFT polymerization of St*

**DAPyP6** (109.68 mg) was dissolved in 5 mL CHCl<sub>3</sub> (20 mg/mL) and the solution was subjected to the pulsed ultrasound in an ice-bath for 3 h. The colorless solution turned to yellow and was evaporated under vacuo. The product was obtained and named as DAPyP6-3h. After that, DAPyP6-3h was dissolved in St (1.0 mL) in a 25 mL Schlenk tube. 200 μL solution of 1.49 mg AIBN in 7 mL St was injected into the Schlenk tube. The flask was immediately sealed and degassed by another three freeze-pump-thaw cycles. After being stirred in an oil bath for 48 h at 60°C, the mixture was precipitated in methanol. The precipitate was collected and characterized by <sup>1</sup>H NMR and GPC.

*Representative Procedures for the radical polymerization of St*

The radical polymerization of St was conducted in the same conditions as the above mentioned RAFT polymerization without **DAPyP6-3h** in the system. 1.52 mg AIBN was dissolved in 7 mL St. 200 μL of such solution was injected into the Schlenk tube. Then, 1.0 mL styrene was added. After that, the flask was immediately sealed and degassed by three freeze-pump-thaw cycles. After being stirred in an oil bath for 48 h at 60°C, the mixture was precipitated in methanol. The precipitate was collected and characterized by <sup>1</sup>H NMR and GPC.

### 3. UV-Vis spectrum of the dithioester 1

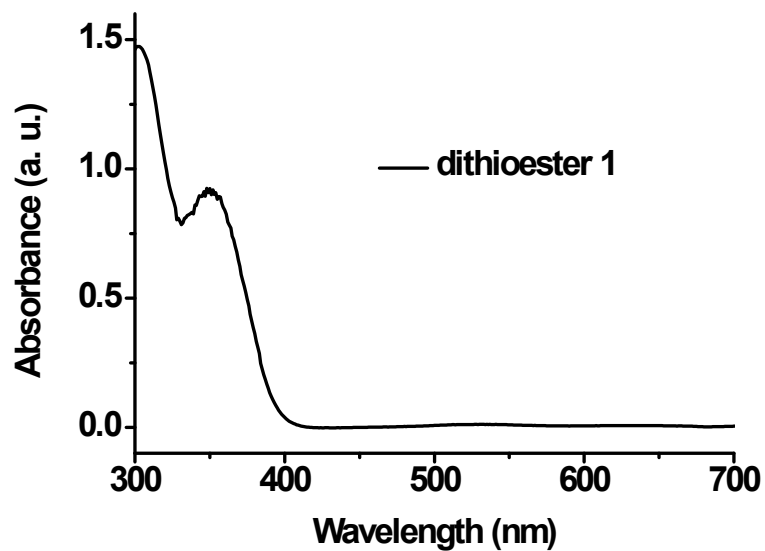

Figure S1. UV-Vis spectrum of dithioester 1 (concentration  $1.0 \times 10^{-4}$  mol/mL)

### 4. GPC traces of control samples HQPn before and after sonication

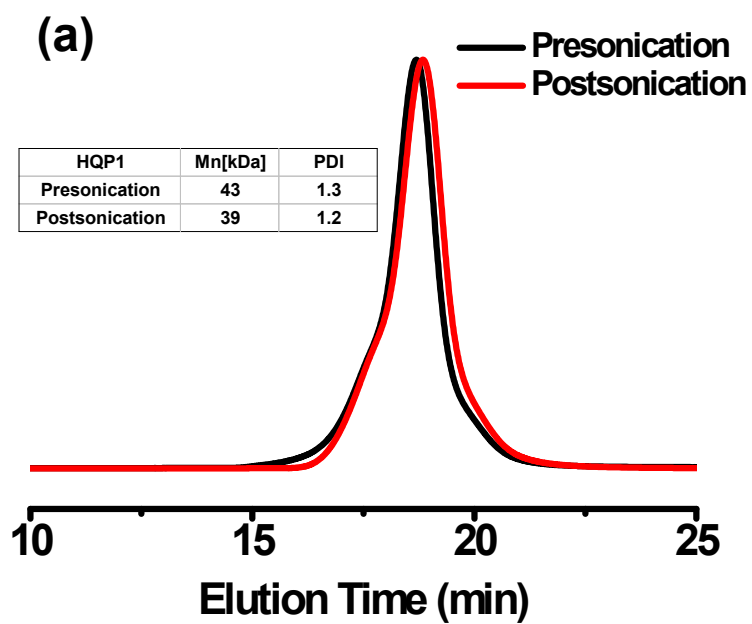

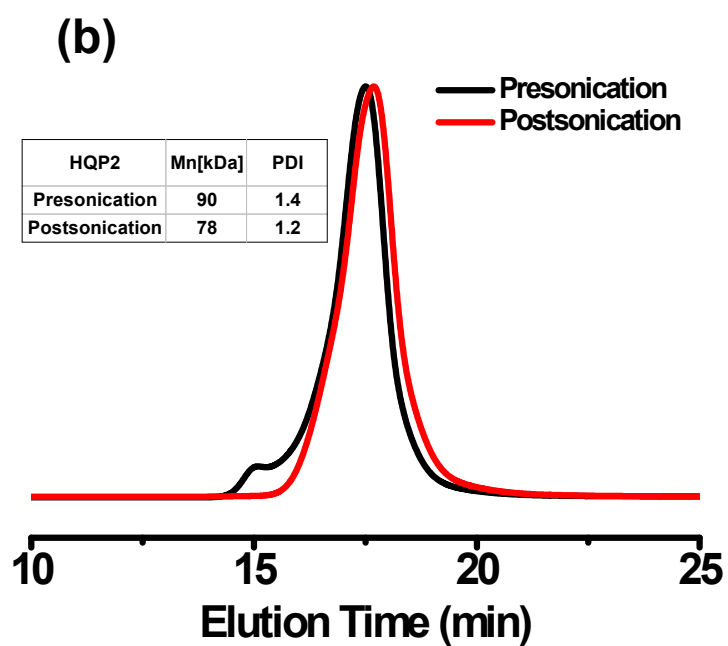

Figure S2. GPC traces of (a) **HQP1** and (b) **HQP2** before and after sonication for 3 h.

### 5. Photographs of **HQP2** (a) before and (b) after sonication for 3 h

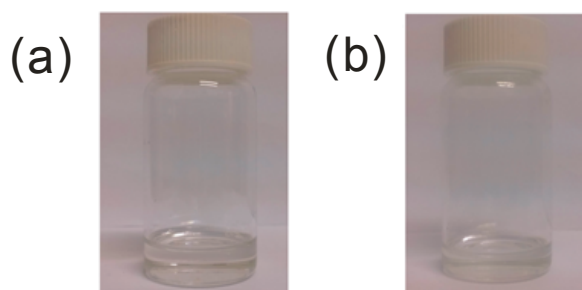

Figure S3. Photographs of **HQP2** (a) before and (b) after sonication for 3 h.

## 6. $^1\text{H}$ NMR spectra of DAPyP6 before and after sonication

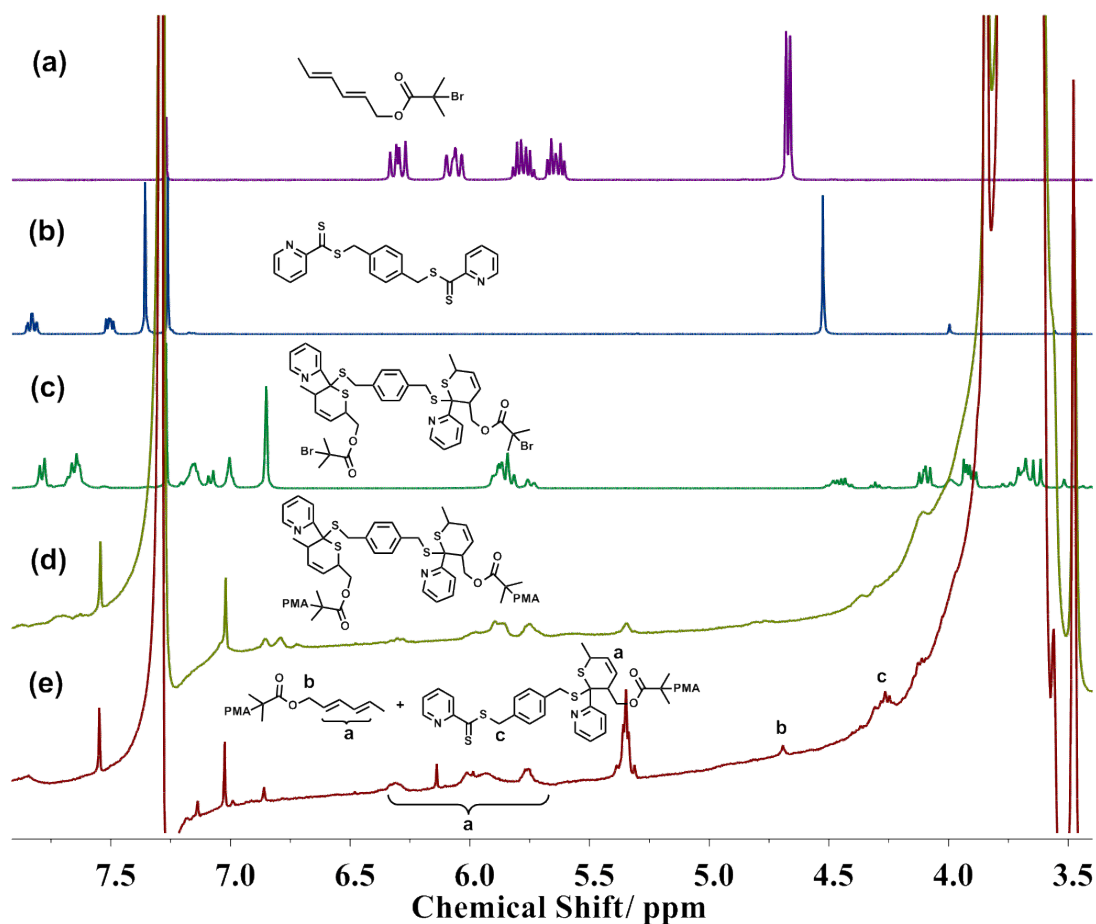

Figure S4.  $^1\text{H}$  NMR spectra of (a) diene **2**, (b) dithioester **1**, (c) initiator **DAPy-2Br**, (d) and (e) **DAPyP6** before and after sonication.

## 7. Synthesis of DAPyP6-3h-Py

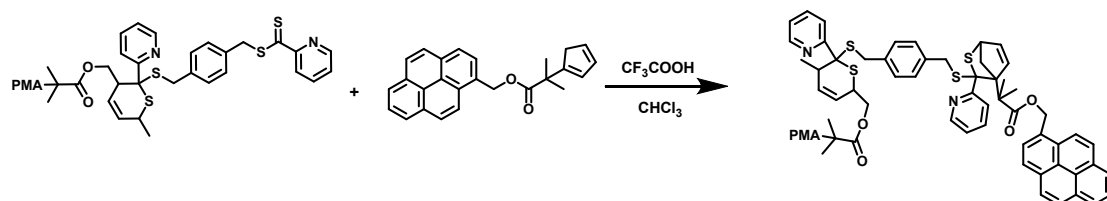

Figure S5. The synthesis of **DAPyP6-3h-Py**.

## 8. $^1\text{H}$ NMR spectra of DAPyP6-3h and DAPyP6-3h-Py

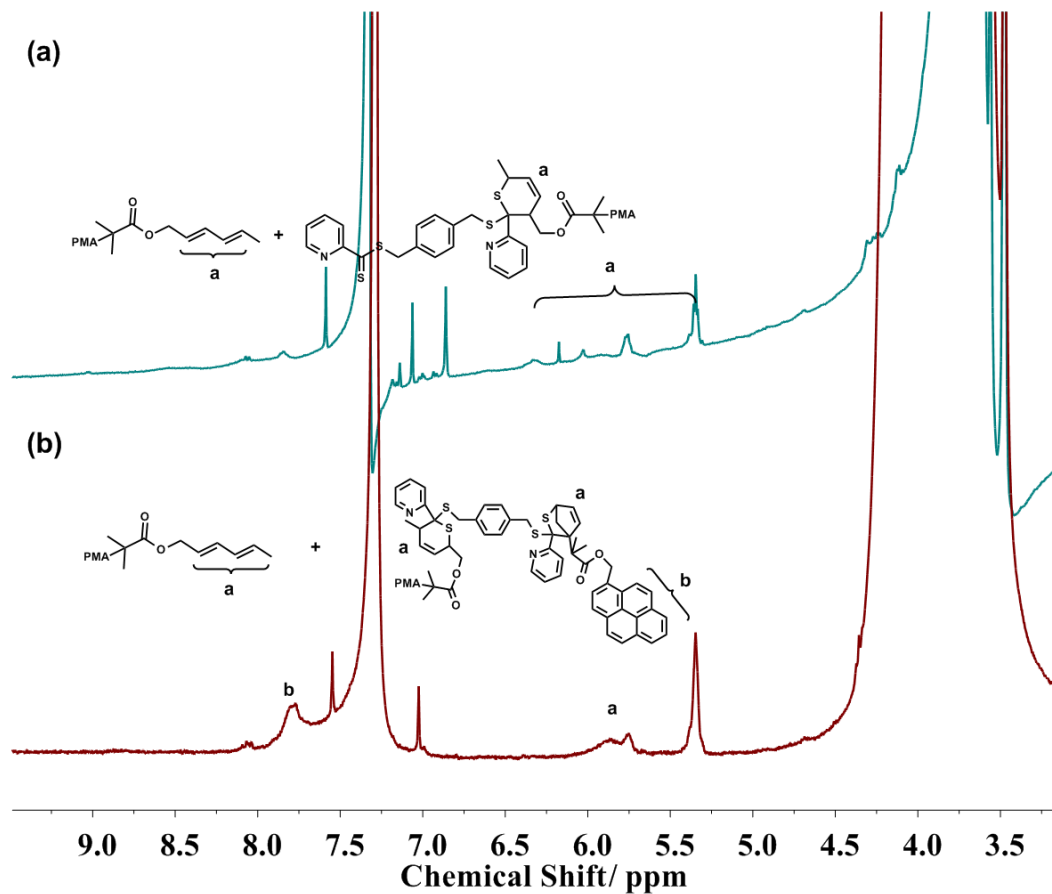

Figure S6.  $^1\text{H}$  NMR spectra of (a) DAPy-P6-3h and (b) DAPy-P6-3h-Py

## 9. Excitation fluorescent spectrum and Emission fluorescent spectrum of DAPyP6-3h-Py

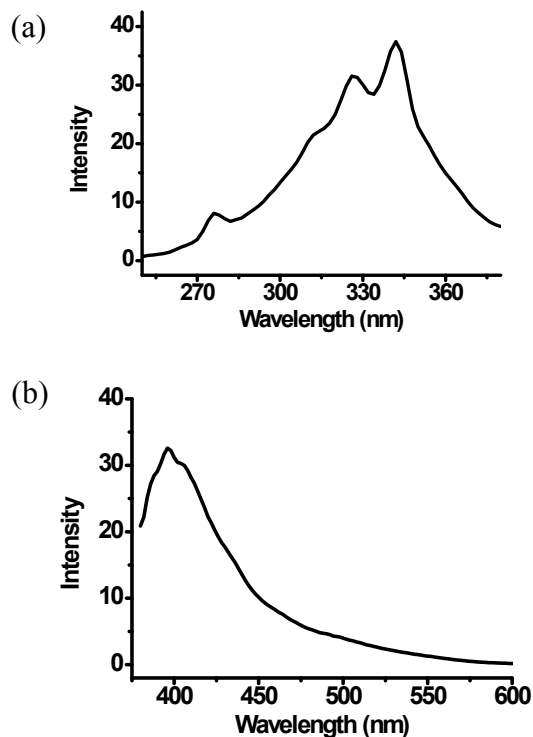

Figure S7. (a) Excitation fluorescent spectrum of **DAPyP6-3h-Py** in THF. The emission was set at 395 nm. (b) Emission fluorescent spectrum of the **DAPyP6-3h-Py** in THF. The excitation wavelength was set at 365 nm.

## 10. Pictures of DAPyP6-3h, DAPyP6-3h-Py under sunlight and 365 nm UV light.

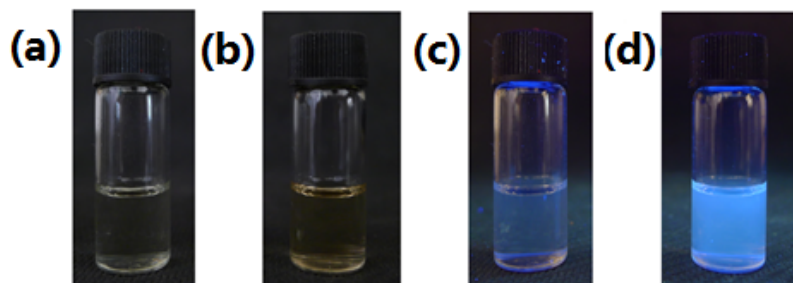

Figure S8. Pictures of (a) **DAPyP6-3h**; (b) **DAPyP6-3h-Py** under sunlight; (c) **DAPyP6-3h** (d) **DAPyP6-3h-Py** under 365 nm UV light. The concentration of the sample is 20 mg/mL.

## 11. RAFT polymerization of St using released 1 as RAFT agent

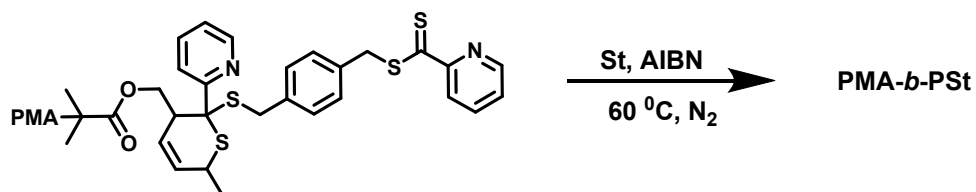

Figure S9. RAFT polymerization of St using released 1 as RAFT agent

## 12. GPC traces of DAPyP6 after sonication for 3h, DAPyP6-*b*-PSt block polymer and PSt

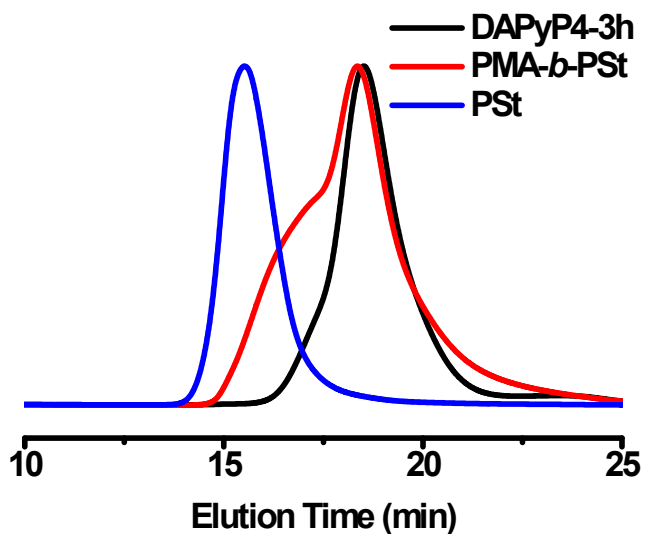

Figure S10. GPC traces of the DAPyP6 after sonication for 3 h (black); the PMA-*b*-PSt block polymer initiated by DAPyP6-3h (red) and Polystyrene synthesized by radical polymerization (blue)

**13.  $^1\text{H}$  NMR spectra of DAPy-P6 after sonication for 3h, PSt obtained from the radical polymerization of St and PMA-*b*-PSt block copolymer**

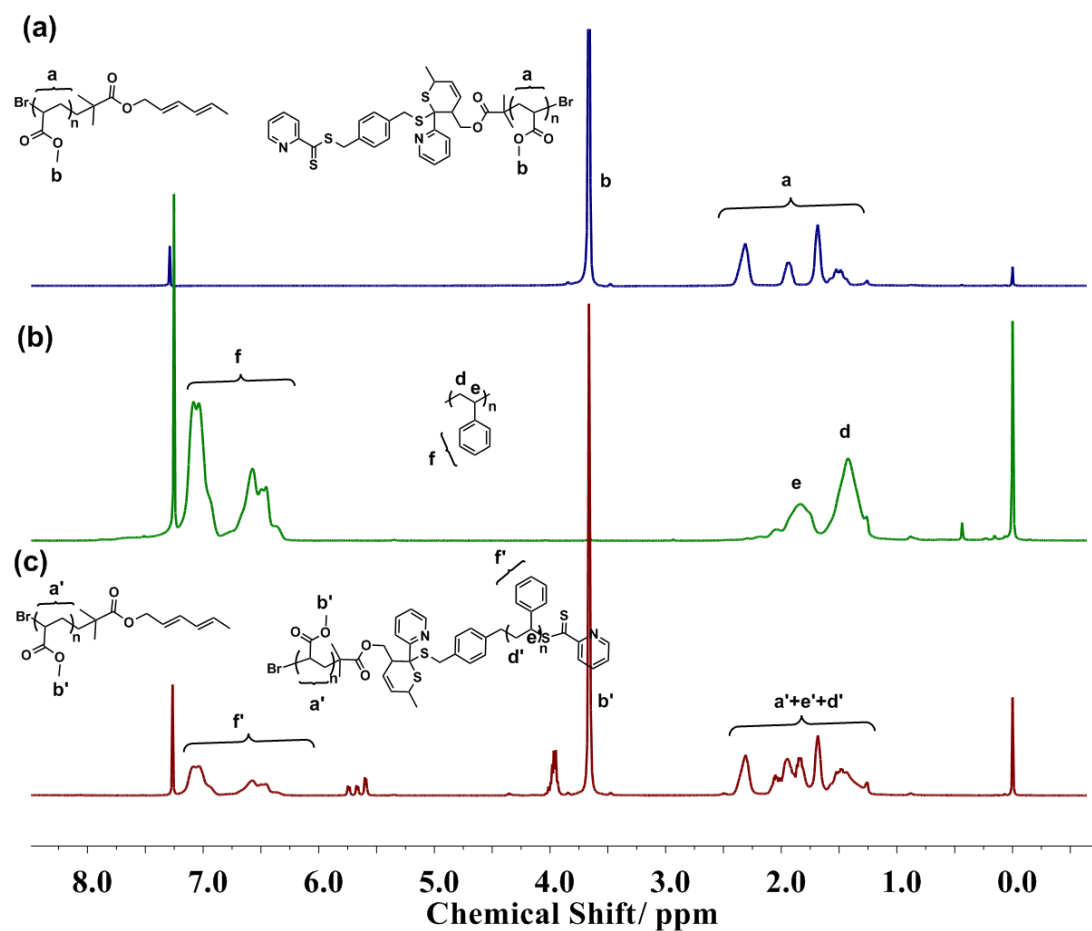

Figure S11.  $^1\text{H}$  NMR spectra of (a) DAPy-P6 after sonication for 3 h, (b) PSt obtained from the radical polymerization of styrene and (c) PMA-*b*-PSt block copolymer using DAPy-P6-3h as a RAFT agent in the St polymerization.



## 14. Theoretical Calculation

The activation energy of the chain scission was calculated based on the Extended Bell Theory (EBT).<sup>[S2]</sup> The EBT calculations were conducted with the Gaussian package using density functional theory, employing the 6-31G\* basis set and the B3LYP exchange-correlation energy functional. An analogue of RAFT-HDA adducts with a benzyl ring and a pyridine unit in the structure was employed as a model for simplifying the calculation process. Figure S12 and S13 showed the optimized structures of the model molecule and its transition state. Table S1 demonstrated the  $\Delta R$  ( $\Delta R$  refers to the change in the mechanical pulling coordinate) and  $\Delta\chi$  ( $\Delta\chi$  refers to the change in the compliances of the reactant state and transition state in the pulling along R) for the atom pair in all the possible pulling points for RAFT-HDA mechanophore, which was calculated from the molecules's ( $3N \times 3N$ ) Hessians in the RAFT-HDA adduct and TS configurations. The possible situations were summarized in Figure S14. From Table S1, we can get the values of  $\Delta R$  and  $\Delta\chi$ , and applied them in the equation:  $E = E_0 - F\Delta R - F^2\Delta\chi/2$  to obtain the change in activation energy in the cycloreversion of DA adduct.

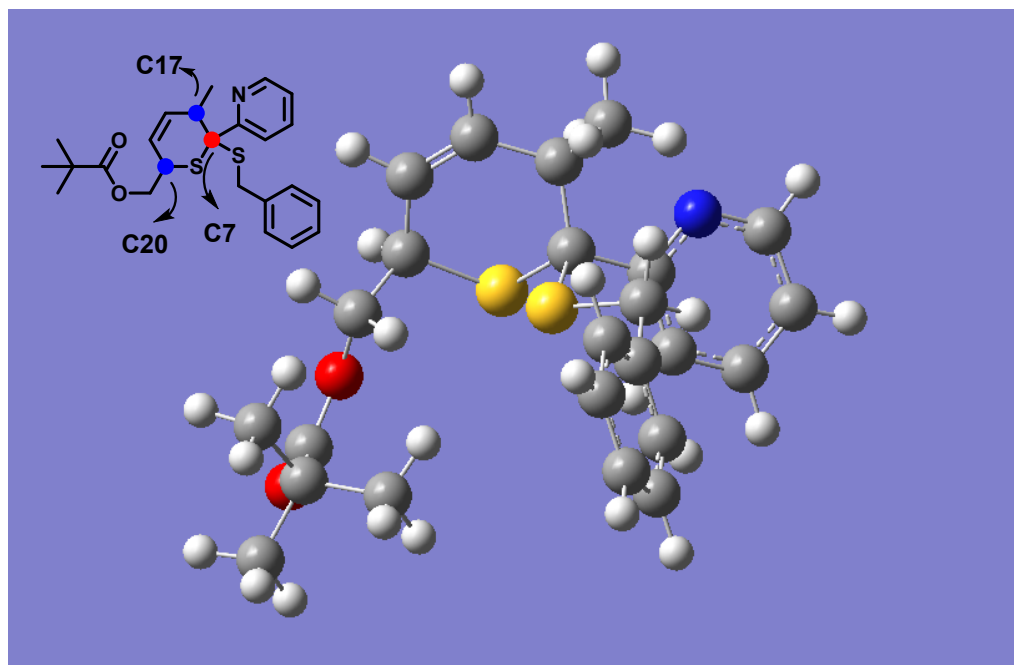

Figure S12. Initial optimized molecular structure of the model molecule.

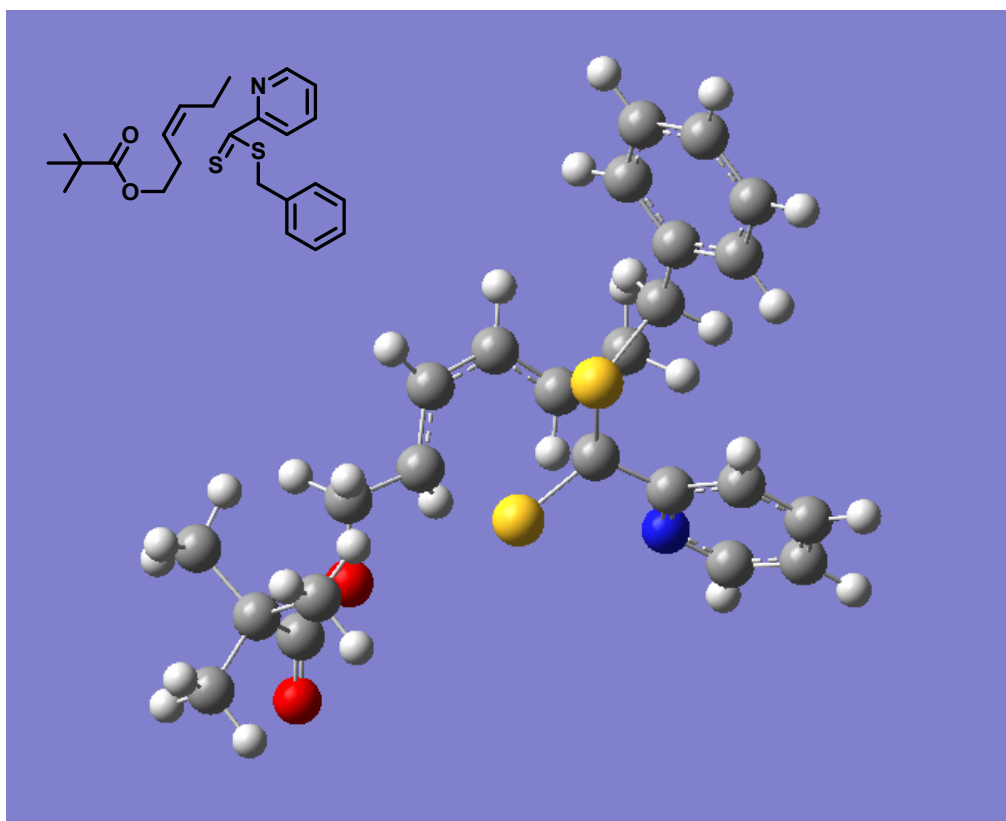

Figure S13. Optimized molecular structure of the transition state.

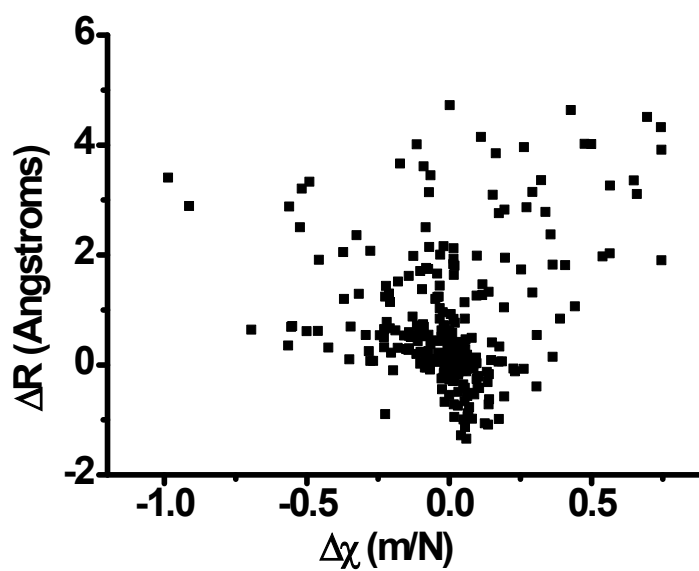

Figure S14. Computed values of  $\Delta R$  and  $\Delta \chi$  for all possible combinations of pulling points for the indicated mechanophore.

Table S1. Compliances and internuclear distances

| Atom pairs |    | $\Delta R(\text{\AA})$ | $\Delta\gamma(\text{m/N})$ |
|------------|----|------------------------|----------------------------|
| 12         | 11 | 0.000083               | 0.000001                   |
| 12         | 16 | -0.00052               | 0                          |
| 12         | 15 | -0.00012               | -1.2E-05                   |
| 12         | 14 | 0.00013                | -7E-06                     |
| 12         | 13 | -0.00003               | 0.000003                   |
| 12         | 10 | -0.00154               | -8E-06                     |
| 12         | 9  | 0.010837               | 0.029491                   |
| 12         | 7  | -0.04886               | -0.08496                   |
| 12         | 8  | 0.271333               | -0.14263                   |
| 12         | 2  | 0.235498               | -0.10031                   |
| 12         | 3  | 0.072126               | -0.26696                   |
| 12         | 4  | 0.317724               | -0.22786                   |
| 12         | 5  | 0.611028               | -0.50024                   |
| 12         | 6  | 0.689538               | -0.55426                   |
| 12         | 1  | 0.543446               | -0.29267                   |
| 12         | 17 | 0.032126               | 0.023328                   |
| 12         | 26 | 0.065008               | 0.185717                   |
| 12         | 18 | -0.72153               | 0.016042                   |
| 12         | 19 | -0.4167                | 0.054757                   |
| 12         | 20 | 0.545957               | -0.07243                   |
| 12         | 21 | 1.745868               | -0.07377                   |
| 12         | 22 | 2.051321               | -0.37242                   |
| 12         | 23 | 2.879945               | -0.56142                   |
| 12         | 27 | 2.887834               | -0.91335                   |
| 12         | 24 | 3.610323               | -0.08935                   |
| 12         | 28 | 4.019633               | 0.475863                   |
| 12         | 29 | 3.449305               | -0.06541                   |
| 12         | 25 | 4.01094                | -0.11449                   |
| 11         | 16 | -0.00028               | -5E-06                     |
| 11         | 15 | 0.000159               | -0.00001                   |
| 11         | 14 | 0.000316               | -6E-06                     |
| 11         | 13 | 0.000081               | -7E-06                     |
| 11         | 10 | -0.00079               | -7E-06                     |
| 11         | 9  | 0.016732               | -9.5E-05                   |
| 11         | 7  | -0.07619               | -0.00334                   |
| 11         | 8  | -0.01182               | -0.0171                    |
| 11         | 2  | 0.197648               | -0.02595                   |
| 11         | 3  | -0.00444               | -0.07595                   |

|    |    |          |          |
|----|----|----------|----------|
| 11 | 4  | 0.220567 | -0.20391 |
| 11 | 5  | 0.527977 | -0.14056 |
| 11 | 6  | 0.649426 | -0.22792 |
| 11 | 1  | 0.531943 | -0.1304  |
| 11 | 17 | -0.10291 | 0.04706  |
| 11 | 26 | 0.183658 | 0.063097 |
| 11 | 18 | -0.94043 | 0.064615 |
| 11 | 19 | -0.71915 | 0.138995 |
| 11 | 20 | 0.131661 | 0.094643 |
| 11 | 21 | 1.269577 | 0.116328 |
| 11 | 22 | 1.439451 | -0.03321 |
| 11 | 23 | 2.146042 | -0.06982 |
| 11 | 27 | 2.074638 | -0.27684 |
| 11 | 24 | 2.864834 | 0.271375 |
| 11 | 28 | 3.262883 | 0.564361 |
| 11 | 29 | 2.822574 | 0.194162 |
| 11 | 25 | 3.143596 | 0.292053 |
| 16 | 15 | -0.00002 | 0.000004 |
| 16 | 14 | -0.00027 | -3E-06   |
| 16 | 13 | -0.00061 | -5E-06   |
| 16 | 10 | 0.000312 | -0.00013 |
| 16 | 9  | 0.027402 | 0.089712 |
| 16 | 7  | -0.09077 | 0.011025 |
| 16 | 8  | -0.20826 | 0.102943 |
| 16 | 2  | 0.166128 | -0.0031  |
| 16 | 3  | -0.01837 | -0.06866 |
| 16 | 4  | 0.196529 | -0.11458 |
| 16 | 5  | 0.503294 | -0.22897 |
| 16 | 6  | 0.628585 | -0.18823 |
| 16 | 1  | 0.505252 | -0.13507 |
| 16 | 17 | -0.22061 | -0.0075  |
| 16 | 26 | 0.307402 | -0.18057 |
| 16 | 18 | -1.13186 | 0.055874 |
| 16 | 19 | -0.98085 | 0.080242 |
| 16 | 20 | -0.12798 | 0.131981 |
| 16 | 21 | 1.043102 | 0.192762 |
| 16 | 22 | 1.241548 | -0.03683 |
| 16 | 23 | 1.979097 | -0.12543 |
| 16 | 27 | 1.912208 | -0.45759 |
| 16 | 24 | 2.760132 | 0.174643 |
| 16 | 28 | 3.109685 | 0.659315 |

|    |    |          |          |
|----|----|----------|----------|
| 16 | 29 | 2.78398  | 0.337715 |
| 16 | 25 | 3.09427  | 0.152745 |
| 15 | 14 | -0.00019 | -3E-06   |
| 15 | 13 | -0.0003  | 0.000001 |
| 15 | 10 | 0.000106 | -5.5E-05 |
| 15 | 9  | 0.028736 | 0.096414 |
| 15 | 7  | -0.08298 | 0.030761 |
| 15 | 8  | -0.11688 | 0.230881 |
| 15 | 2  | 0.18146  | -0.00744 |
| 15 | 3  | 0.021236 | -0.1012  |
| 15 | 4  | 0.248881 | -0.28212 |
| 15 | 5  | 0.556712 | -0.10657 |
| 15 | 6  | 0.661421 | -0.20878 |
| 15 | 1  | 0.514128 | -0.11542 |
| 15 | 17 | -0.1808  | 0.031612 |
| 15 | 26 | 0.279656 | -0.14475 |
| 15 | 18 | -1.06365 | 0.125172 |
| 15 | 19 | -0.88205 | 0.065933 |
| 15 | 20 | 0.057261 | 0.173911 |
| 15 | 21 | 1.31568  | 0.292312 |
| 15 | 22 | 1.637186 | 0.016235 |
| 15 | 23 | 2.504843 | -0.08287 |
| 15 | 27 | 2.502475 | -0.52371 |
| 15 | 24 | 3.359027 | 0.322946 |
| 15 | 28 | 3.660153 | -0.17208 |
| 15 | 29 | 3.353281 | 0.648041 |
| 15 | 25 | 3.850399 | 0.163474 |
| 14 | 13 | 0.000023 | -2E-06   |
| 14 | 10 | -0.00049 | -1.3E-05 |
| 14 | 9  | 0.023691 | 0.007137 |
| 14 | 7  | -0.06588 | -0.00317 |
| 14 | 8  | 0.105263 | -0.05779 |
| 14 | 2  | 0.211916 | -0.079   |
| 14 | 3  | 0.070762 | -0.27694 |
| 14 | 4  | 0.314579 | -0.4239  |
| 14 | 5  | 0.617854 | -0.4612  |
| 14 | 6  | 0.697443 | -0.34598 |
| 14 | 1  | 0.532691 | -0.15849 |
| 14 | 17 | -0.07215 | 0.066974 |
| 14 | 26 | 0.181431 | -0.00909 |
| 14 | 18 | -0.89767 | -0.22442 |

|    |    |          |          |
|----|----|----------|----------|
| 14 | 19 | -0.62751 | 0.139948 |
| 14 | 20 | 0.406134 | 0.150345 |
| 14 | 21 | 1.733175 | 0.253132 |
| 14 | 22 | 2.157839 | -0.01921 |
| 14 | 23 | 3.138983 | -0.0706  |
| 14 | 27 | 3.205455 | -0.51734 |
| 14 | 24 | 4.018099 | 0.498626 |
| 14 | 28 | 4.321642 | 0.743647 |
| 14 | 29 | 3.913033 | 0.745542 |
| 14 | 25 | 4.633313 | 0.427056 |
| 13 | 10 | -0.00131 | -3E-06   |
| 13 | 9  | 0.015648 | 0.012094 |
| 13 | 7  | -0.0495  | -0.08012 |
| 13 | 8  | 0.287632 | -0.15131 |
| 13 | 2  | 0.233766 | -0.09524 |
| 13 | 3  | 0.098636 | -0.3507  |
| 13 | 4  | 0.349887 | -0.56575 |
| 13 | 5  | 0.642068 | -0.69464 |
| 13 | 6  | 0.705279 | -0.55103 |
| 13 | 1  | 0.539692 | -0.24369 |
| 13 | 17 | 0.023044 | 0.020887 |
| 13 | 26 | 0.08583  | 0.147483 |
| 13 | 18 | -0.74412 | 0.030491 |
| 13 | 19 | -0.41811 | 0.099747 |
| 13 | 20 | 0.631788 | -0.01852 |
| 13 | 21 | 1.932367 | 0.015223 |
| 13 | 22 | 2.359931 | -0.3257  |
| 13 | 23 | 3.329604 | -0.49087 |
| 13 | 27 | 3.408104 | -0.98731 |
| 13 | 24 | 4.148335 | 0.111971 |
| 13 | 28 | 4.509835 | 0.695021 |
| 13 | 29 | 3.958349 | 0.262745 |
| 13 | 25 | 4.726264 | 0.002026 |
| 10 | 9  | -0.00367 | -1.3E-05 |
| 10 | 7  | -0.08941 | -0.00186 |
| 10 | 8  | -0.12815 | -0.00351 |
| 10 | 2  | 0.173491 | -0.01146 |
| 10 | 3  | -0.08683 | -0.06752 |
| 10 | 4  | 0.120733 | -0.08051 |
| 10 | 5  | 0.430707 | -0.11074 |
| 10 | 6  | 0.593493 | -0.14081 |

|    |    |          |          |
|----|----|----------|----------|
| 10 | 1  | 0.525533 | -0.0962  |
| 10 | 17 | -0.13419 | 0.026195 |
| 10 | 26 | 0.188775 | 0.022801 |
| 10 | 18 | -0.94664 | 0.01796  |
| 10 | 19 | -0.77215 | 0.07045  |
| 10 | 20 | -0.11655 | 0.059284 |
| 10 | 21 | 0.840491 | 0.054523 |
| 10 | 22 | 0.841784 | -0.03294 |
| 10 | 23 | 1.37391  | -0.09493 |
| 10 | 27 | 1.241284 | -0.22461 |
| 10 | 24 | 1.986062 | 0.096824 |
| 10 | 28 | 2.371105 | 0.356401 |
| 10 | 29 | 2.003339 | -0.03105 |
| 10 | 25 | 2.12109  | 0.015547 |
| 9  | 7  | -0.09263 | -0.00135 |
| 9  | 8  | -0.10325 | -0.00586 |
| 9  | 2  | 0.043876 | -0.00283 |
| 9  | 3  | -0.00688 | -0.00841 |
| 9  | 4  | 0.061846 | -0.00879 |
| 9  | 5  | 0.139753 | -0.01748 |
| 9  | 6  | 0.169016 | -0.02774 |
| 9  | 1  | 0.150246 | -0.02376 |
| 9  | 17 | 0.579138 | 0.011233 |
| 9  | 26 | 0.835526 | 0.01521  |
| 9  | 18 | -0.0372  | 0.016054 |
| 9  | 19 | -0.05657 | 0.042517 |
| 9  | 20 | 0.46528  | 0.057423 |
| 9  | 21 | 1.260846 | 0.096331 |
| 9  | 22 | 1.140092 | 0.054151 |
| 9  | 23 | 1.46414  | 0.11724  |
| 9  | 27 | 1.331686 | 0.138136 |
| 9  | 24 | 1.823301 | 0.363152 |
| 9  | 28 | 1.902177 | 0.745621 |
| 9  | 29 | 1.946989 | 0.195933 |
| 9  | 25 | 1.814998 | 0.407114 |
| 7  | 8  | -0.15594 | -0.00255 |
| 7  | 2  | -0.0394  | -0.00022 |
| 7  | 3  | -0.02386 | -0.00028 |
| 7  | 4  | -0.02623 | -0.00024 |
| 7  | 5  | -0.02913 | -0.00021 |
| 7  | 6  | -0.0373  | -0.00012 |

|   |    |          |          |
|---|----|----------|----------|
| 7 | 1  | -0.02906 | -0.00017 |
| 7 | 17 | 0.92654  | 0.005448 |
| 7 | 26 | 0.768295 | 0.020021 |
| 7 | 18 | 0.389949 | 0.007716 |
| 7 | 19 | 0.175568 | 0.007875 |
| 7 | 20 | 0.207323 | 0.006353 |
| 7 | 21 | 0.482885 | -0.00225 |
| 7 | 22 | 0.153101 | 0.02097  |
| 7 | 23 | 0.258149 | 0.009756 |
| 7 | 27 | 0.105444 | 0.093302 |
| 7 | 24 | 0.492839 | 0.07901  |
| 7 | 28 | 0.544585 | 0.307293 |
| 7 | 29 | 0.702106 | -0.01339 |
| 7 | 25 | 0.404335 | 0.053522 |
| 8 | 2  | 0.081505 | -0.00276 |
| 8 | 3  | 0.709135 | -0.01843 |
| 8 | 4  | 0.621323 | -0.01236 |
| 8 | 5  | 0.210275 | -0.01462 |
| 8 | 6  | -0.24934 | -0.02681 |
| 8 | 1  | -0.44443 | -0.02503 |
| 8 | 17 | 0.463231 | 0.006163 |
| 8 | 26 | 0.311429 | 0.010185 |
| 8 | 18 | 0.322239 | 0.003417 |
| 8 | 19 | 0.176419 | 0.00803  |
| 8 | 20 | 0.358678 | 0.010549 |
| 8 | 21 | 0.124095 | 0.013242 |
| 8 | 22 | -0.03676 | 0.058854 |
| 8 | 23 | -0.10456 | 0.047332 |
| 8 | 27 | -0.06608 | 0.225768 |
| 8 | 24 | -0.21238 | 0.100871 |
| 8 | 28 | -0.39376 | 0.306318 |
| 8 | 29 | -0.07331 | 0.060096 |
| 8 | 25 | -0.25915 | 0.096033 |
| 2 | 3  | 0.001218 | 0.000006 |
| 2 | 4  | 0.006626 | 0.000038 |
| 2 | 5  | 0.011019 | 0.00007  |
| 2 | 6  | 0.004122 | 0.00004  |
| 2 | 1  | 0.008934 | 0.000089 |
| 2 | 17 | 0.416253 | 0.026979 |
| 2 | 26 | 0.116089 | 0.037362 |
| 2 | 18 | 0.050722 | 0.014169 |



|   |    |          |          |
|---|----|----------|----------|
| 2 | 19 | -0.00062 | 0.009747 |
| 2 | 20 | 0.077727 | 0.016377 |
| 2 | 21 | 0.393622 | -0.00554 |
| 2 | 22 | 0.077849 | 0.018324 |
| 2 | 23 | 0.249671 | -0.07283 |
| 2 | 27 | 0.052377 | -0.04284 |
| 2 | 24 | 0.596323 | 0.001095 |
| 2 | 28 | 0.839926 | 0.3896   |
| 2 | 29 | 0.737218 | -0.09118 |
| 2 | 25 | 0.512014 | -0.02696 |
| 3 | 4  | 0.001879 | 0.00002  |
| 3 | 5  | 0.000982 | -6E-06   |
| 3 | 6  | -0.00368 | 0.000016 |
| 3 | 1  | 0.001372 | 0.000111 |
| 3 | 17 | 0.283541 | 0.057128 |
| 3 | 26 | -0.31569 | 0.13521  |
| 3 | 18 | -0.01266 | 0.036129 |
| 3 | 19 | 0.223891 | 0.008239 |
| 3 | 20 | 0.721617 | -0.01884 |
| 3 | 21 | 1.234959 | -0.04142 |
| 3 | 22 | 1.1995   | -0.0483  |
| 3 | 23 | 1.515883 | -0.17942 |
| 3 | 27 | 1.435096 | -0.22184 |
| 3 | 24 | 1.80554  | 0.019199 |
| 3 | 28 | 2.026021 | 0.564081 |
| 3 | 29 | 1.764115 | -0.08086 |
| 3 | 25 | 1.834315 | 0.014405 |
| 4 | 5  | -0.0028  | -2.1E-05 |
| 4 | 6  | -0.00257 | 0.000018 |
| 4 | 1  | 0.000445 | -5E-06   |
| 4 | 17 | 0.124226 | 0.069681 |
| 4 | 26 | -0.57367 | 0.193565 |
| 4 | 18 | -0.10286 | 0.044703 |
| 4 | 19 | 0.134969 | 0.008515 |
| 4 | 20 | 0.54929  | -0.00711 |
| 4 | 21 | 1.03065  | -0.03312 |
| 4 | 22 | 0.958057 | -0.02252 |
| 4 | 23 | 1.298311 | -0.21127 |
| 4 | 27 | 1.198297 | -0.36953 |
| 4 | 24 | 1.660282 | -0.04192 |
| 4 | 28 | 1.970723 | 0.538256 |

|   |    |          |          |
|---|----|----------|----------|
| 4 | 29 | 1.616185 | -0.14156 |
| 4 | 25 | 1.706257 | -0.10183 |
| 5 | 6  | 0.004595 | 0.000043 |
| 5 | 1  | 0.002879 | 0        |
| 5 | 17 | 0.030075 | 0.052961 |
| 5 | 26 | -0.53813 | 0.08813  |
| 5 | 18 | -0.14356 | 0.032292 |
| 5 | 19 | -0.0871  | 0.013511 |
| 5 | 20 | -0.01497 | 0.034368 |
| 5 | 21 | 0.284671 | 0.034855 |
| 5 | 22 | -0.04979 | 0.085907 |
| 5 | 23 | 0.160643 | -0.08249 |
| 5 | 27 | -0.10086 | -0.19674 |
| 5 | 24 | 0.628057 | -0.02709 |
| 5 | 28 | 1.06431  | 0.441885 |
| 5 | 29 | 0.716598 | -0.11299 |
| 5 | 25 | 0.545669 | -0.09918 |
| 6 | 1  | -0.00604 | -4.8E-05 |
| 6 | 17 | 0.044333 | 0.029821 |
| 6 | 26 | -0.23192 | -0.01446 |
| 6 | 18 | -0.11873 | 0.014039 |
| 6 | 19 | -0.29058 | 0.017881 |
| 6 | 20 | -0.56729 | 0.064133 |
| 6 | 21 | -0.41975 | 0.105564 |
| 6 | 22 | -0.9871  | 0.174665 |
| 6 | 23 | -0.89104 | 0.067604 |
| 6 | 27 | -1.28062 | 0.041355 |
| 6 | 24 | -0.35402 | 0.049426 |
| 6 | 28 | 0.148455 | 0.363692 |
| 6 | 29 | -0.13656 | -0.00145 |
| 6 | 25 | -0.54817 | 0.000321 |
| 1 | 17 | 0.240104 | 0.021334 |
| 1 | 26 | 0.174414 | 0.040651 |
| 1 | 18 | -0.01558 | 0.008153 |
| 1 | 19 | -0.29691 | 0.012735 |
| 1 | 20 | -0.66427 | 0.054351 |
| 1 | 21 | -0.51025 | 0.082059 |
| 1 | 22 | -1.08823 | 0.136753 |
| 1 | 23 | -0.99198 | 0.050562 |
| 1 | 27 | -1.34204 | 0.060478 |
| 1 | 24 | -0.4915  | 0.032263 |

|    |    |          |          |
|----|----|----------|----------|
| 1  | 28 | -0.07042 | 0.261599 |
| 1  | 29 | -0.23629 | -0.02087 |
| 1  | 25 | -0.67222 | -0.01644 |
| 17 | 26 | -0.0388  | -0.00033 |
| 17 | 18 | -0.12238 | -0.0011  |
| 17 | 19 | -0.11026 | 0.000162 |
| 17 | 20 | -0.24272 | 0.006074 |
| 17 | 21 | 0.135701 | -0.00671 |
| 17 | 22 | -0.19376 | 0.014089 |
| 17 | 23 | -0.03092 | -0.01209 |
| 17 | 27 | -0.26854 | 0.000706 |
| 17 | 24 | 0.381814 | -0.06594 |
| 17 | 28 | 0.692686 | -0.08895 |
| 17 | 29 | 0.519139 | -0.07876 |
| 17 | 25 | 0.300789 | -0.14067 |
| 26 | 18 | 0.053339 | -0.00158 |
| 26 | 19 | 0.099932 | -0.00447 |
| 26 | 20 | -0.13142 | 0.00279  |
| 26 | 21 | 0.44572  | -0.04194 |
| 26 | 22 | -0.02216 | -0.00409 |
| 26 | 23 | 0.222384 | -0.03888 |
| 26 | 27 | -0.15085 | -0.01864 |
| 26 | 24 | 0.876161 | -0.12819 |
| 26 | 28 | 1.293432 | -0.31755 |
| 26 | 29 | 1.143815 | -0.20728 |
| 26 | 25 | 0.780257 | -0.21955 |
| 18 | 19 | 0.058968 | 0.000272 |
| 18 | 20 | -0.07247 | 0.000825 |
| 18 | 21 | 0.195571 | -0.00748 |
| 18 | 22 | 0.01274  | 0.001658 |
| 18 | 23 | 0.093699 | -0.00631 |
| 18 | 27 | -0.02097 | 0.012992 |
| 18 | 24 | 0.28835  | 0.002267 |
| 18 | 28 | 0.331488 | 0.176391 |
| 18 | 29 | 0.434867 | -0.03192 |
| 18 | 25 | 0.256928 | -0.00563 |
| 19 | 20 | -0.08797 | -0.00061 |
| 19 | 21 | -0.00956 | -0.00106 |
| 19 | 22 | -0.02285 | -0.00153 |
| 19 | 23 | -0.02409 | -0.00123 |
| 19 | 27 | -0.01837 | 0.000492 |

|    |    |          |          |
|----|----|----------|----------|
| 19 | 24 | -0.04082 | 0.01964  |
| 19 | 28 | -0.16774 | 0.139304 |
| 19 | 29 | 0.057092 | -0.01162 |
| 19 | 25 | -0.02679 | 0.013254 |
| 20 | 21 | -0.02155 | -0.00031 |
| 20 | 22 | -0.0059  | 0.000483 |
| 20 | 23 | -0.00459 | -0.001   |
| 20 | 27 | 0.009623 | 0.002604 |
| 20 | 24 | -0.0281  | -0.00098 |
| 20 | 28 | -0.08846 | 0.025986 |
| 20 | 29 | 0.005277 | 0.008322 |
| 20 | 25 | -0.02007 | 0.013095 |
| 21 | 22 | -0.00145 | -3.5E-05 |
| 21 | 23 | -0.00899 | 0.001053 |
| 21 | 27 | -0.01797 | 0.00518  |
| 21 | 24 | -0.0018  | 0.002475 |
| 21 | 28 | -0.03196 | -0.00269 |
| 21 | 29 | 0.029443 | 0.006327 |
| 21 | 25 | 0.001029 | 0.001911 |
| 22 | 23 | 0.003297 | 0.000085 |
| 22 | 27 | 0.004263 | 0.000347 |
| 22 | 24 | -0.00409 | 0.00044  |
| 22 | 28 | -0.06174 | -0.00082 |
| 22 | 29 | 0.041224 | -0.00879 |
| 22 | 25 | 0.002111 | 0.000033 |
| 23 | 27 | -0.00127 | -4E-06   |
| 23 | 24 | -0.00028 | 0.000032 |
| 23 | 28 | 0.003288 | 0.000978 |
| 23 | 29 | -0.00554 | 0.001119 |
| 23 | 25 | 0.00098  | 0.000201 |
| 27 | 24 | 0.001626 | 0.00005  |
| 27 | 28 | 0.04331  | -0.09884 |
| 27 | 29 | -0.03737 | 0.021626 |
| 27 | 25 | 0.00164  | 0.000738 |
| 24 | 28 | -0.00021 | -4E-06   |
| 24 | 29 | 0.001095 | 0.000019 |
| 24 | 25 | -0.00032 | -1E-06   |
| 28 | 29 | 0.003179 | 0.000806 |
| 28 | 25 | 0.000152 | 0.000014 |
| 29 | 25 | -0.001   | 0.00003  |

Reference:

[S1] N. Zydziaik, C. M. Preuss, V. Winkler, M. Bruns, C. Hübner, C. Barner-Kowollik *Macromol. Rapid Commun.* 2013, **34**, 672.

[S2] S. S. M. Konda, J. N. Brantley, B. T. Varghese, K. M. Wiggins, C. W. Bielawski, D. E. Makarov *J. Am. Chem. Soc.* 2013, **135**, 12722.
